# Supplementary material for: Inhibition of MurA Enzyme from Escherichia coli and Staphylococcus aureus by Diterpenes from Lepechinia meyenii and Their Synthetic Analogs
Source: MDPI journal article supplement (doi:10.3390/antibiotics10121535), 2021-12-15
Supplement: s1 [file s1]

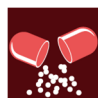

## Article

# Inhibition of MurA enzyme from *Escherichia coli* and *Staphylococcus aureus* by diterpenes from *Lepechinia meyenii* and their synthetic analogs

Macarena Funes Chabán <sup>1,†</sup>, Martina Hrast <sup>2,†</sup>, Rok Frlan <sup>2,†</sup>, Dafni G. Graikioti <sup>3</sup>, Constantinos M. Athanassopoulos <sup>3</sup> and María Cecilia Carpinella<sup>\*,1</sup>

<sup>1</sup> Fine Chemical and Natural Products Laboratory, IRNASUS CONICET-UCC, Universidad Católica de Córdoba, Córdoba X5016DHK, Argentina; macarenafuneschaban@ucc.edu.ar (M. F-Ch.)

<sup>2</sup> Faculty of Pharmacy, University of Ljubljana, SI-1000 Ljubljana, Slovenia; martina.hrast@ffa.uni-lj.si (M.H.); Rok.Frlan@ffa.uni-lj.si (R.F.).

<sup>3</sup> Synthetic Organic Chemistry Laboratory, Department of Chemistry, University of Patras, Greece; dafnigraikioti@upnet.gr (D.G.G.); kath@chemistry.upatras.gr (C.M.A.)

\* Correspondence: ceciliacarpinella@ucc.edu.ar; Tel.: +543514938000

## Supplementary Materials

### NMR spectra

<sup>1</sup>H NMR spectra were obtained at 600.13 MHz and <sup>13</sup>C NMR spectra at 150.90 MHz on a Bruker AVANCEIII HD spectrometer.

### ESI-ITMS spectra

ESI-ITMS spectra were obtained on a Bruker AmaZon SL spectrometer at negative ion mode.

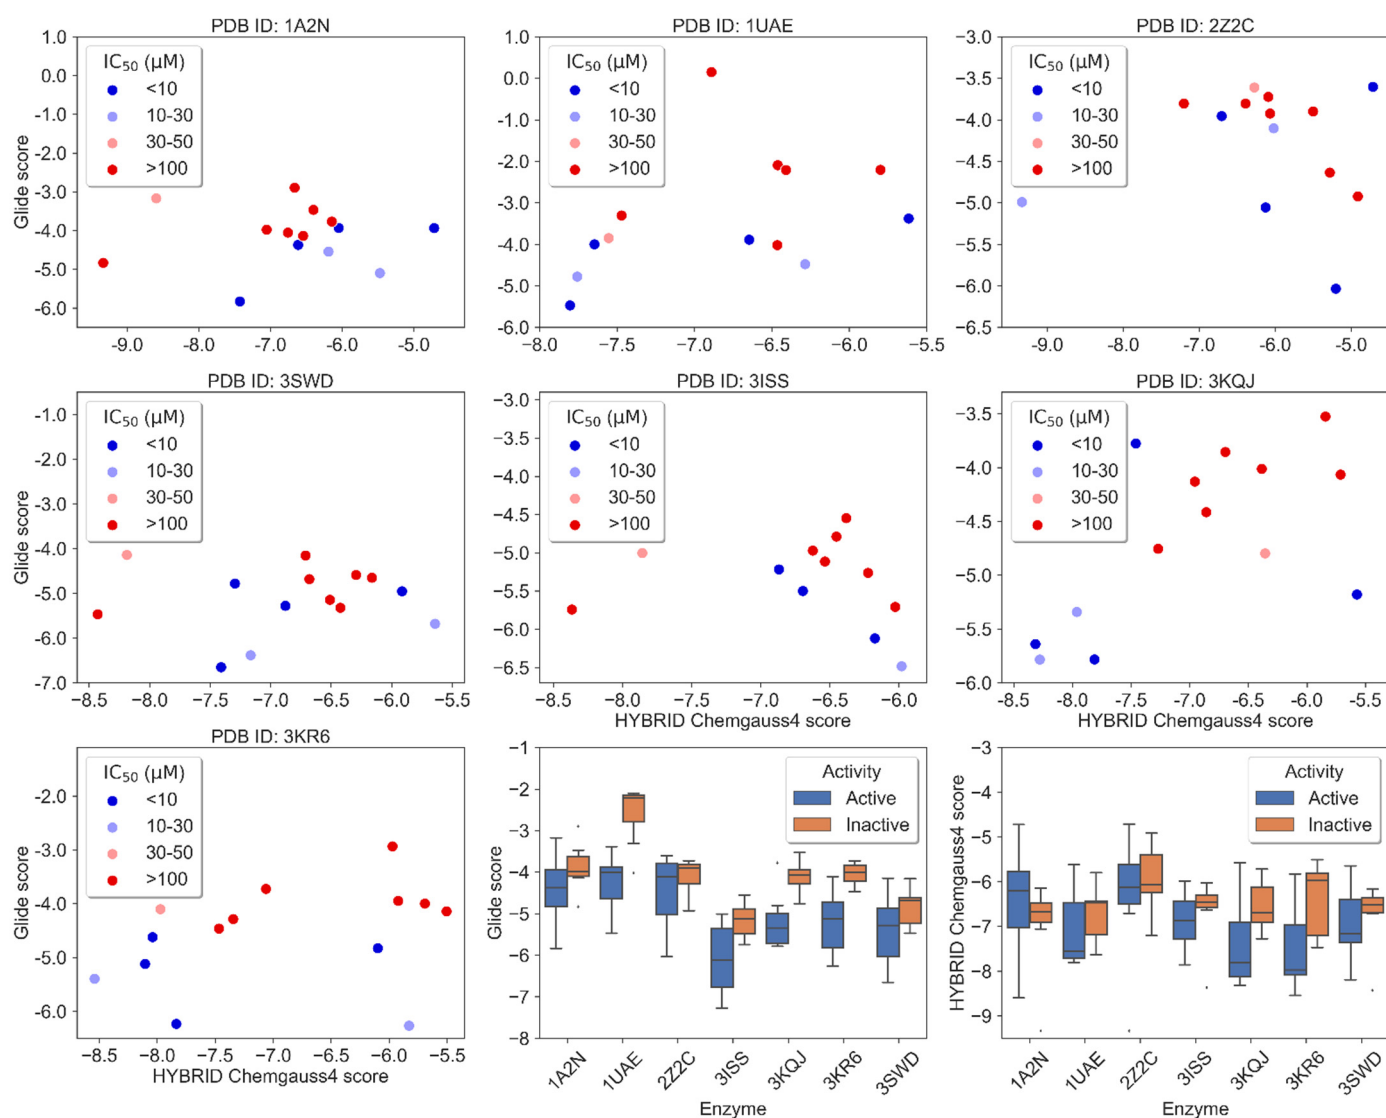

**Figure S1.** Docking results. Scatterplots of Glide and Hybrid scores for each compound and each enzyme used; boxplots of Hybrid and Glide docking scores of active and inactive compounds calculated for each enzyme separately.

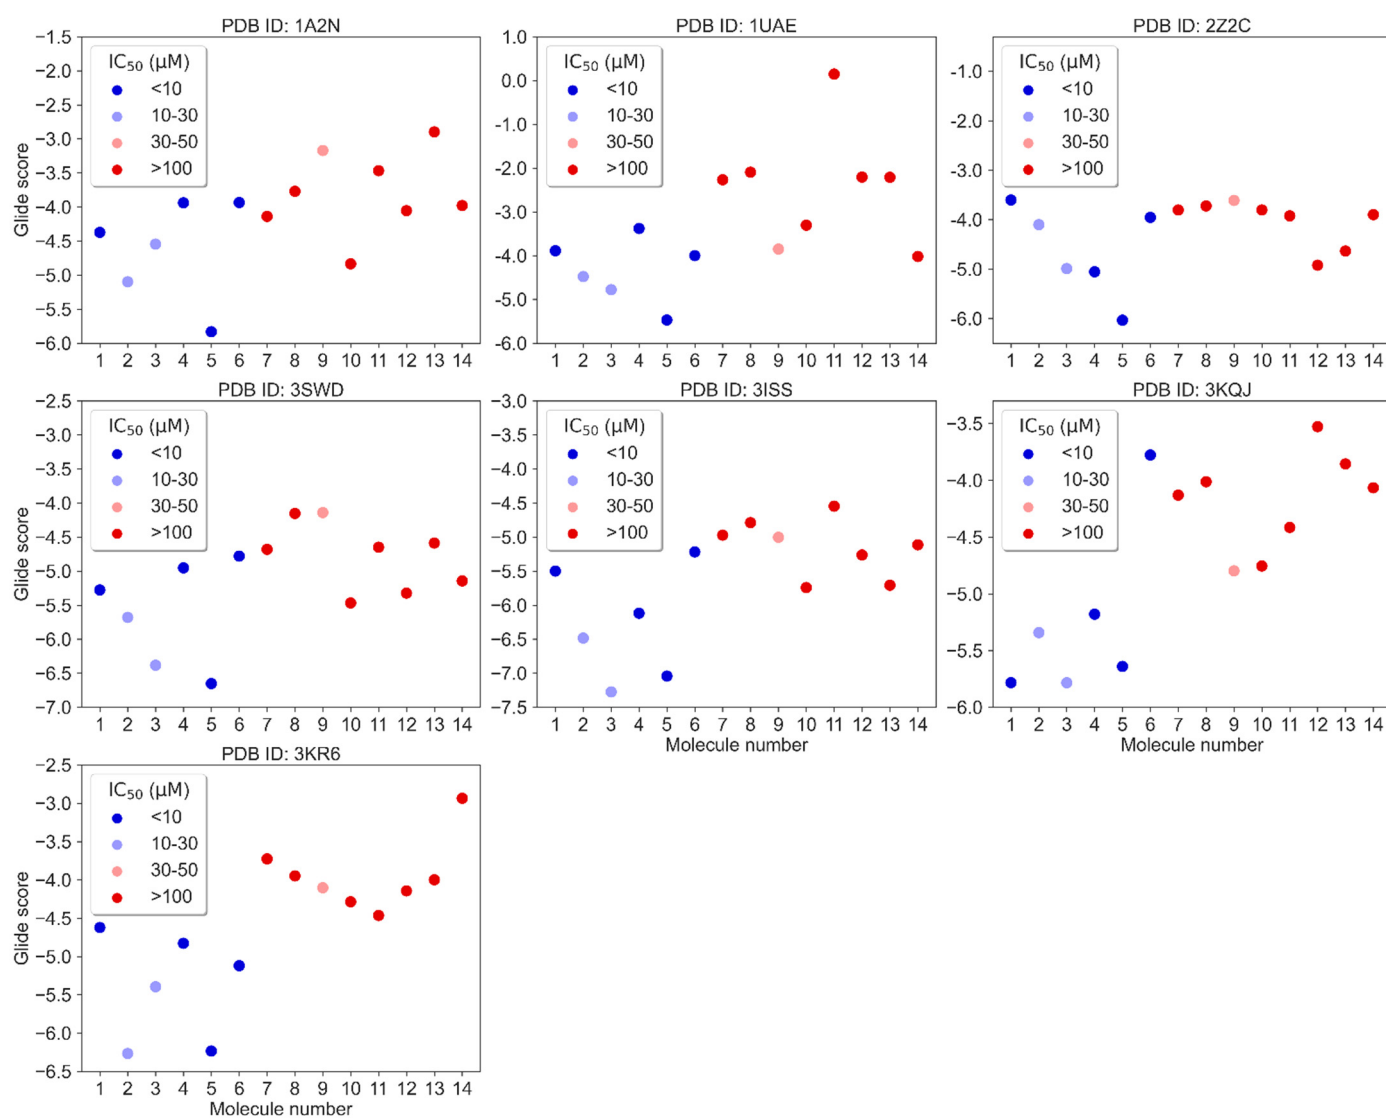

Figure S2. Glide scores per compound and each enzyme analyzed.

## NMR spectra data

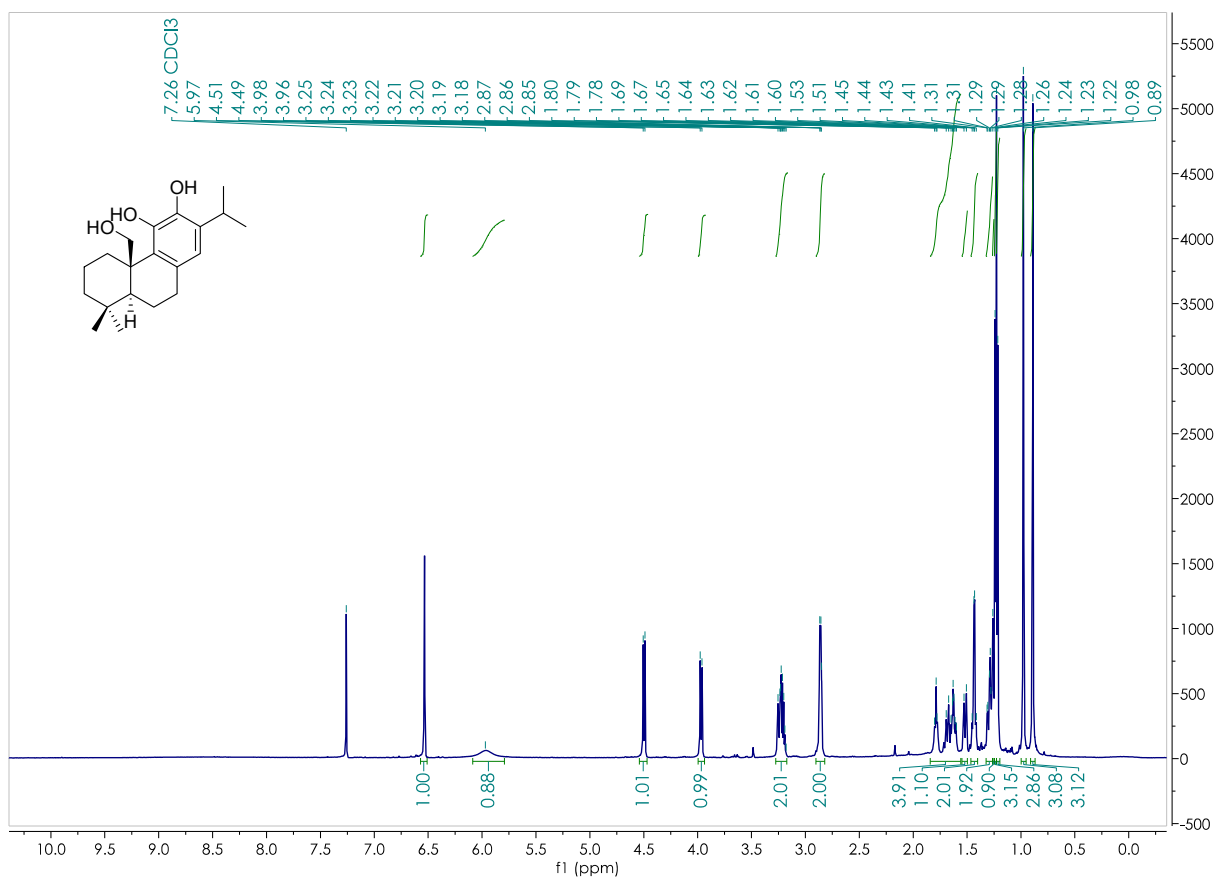Figure S3. <sup>1</sup>H-NMR spectrum of compound 5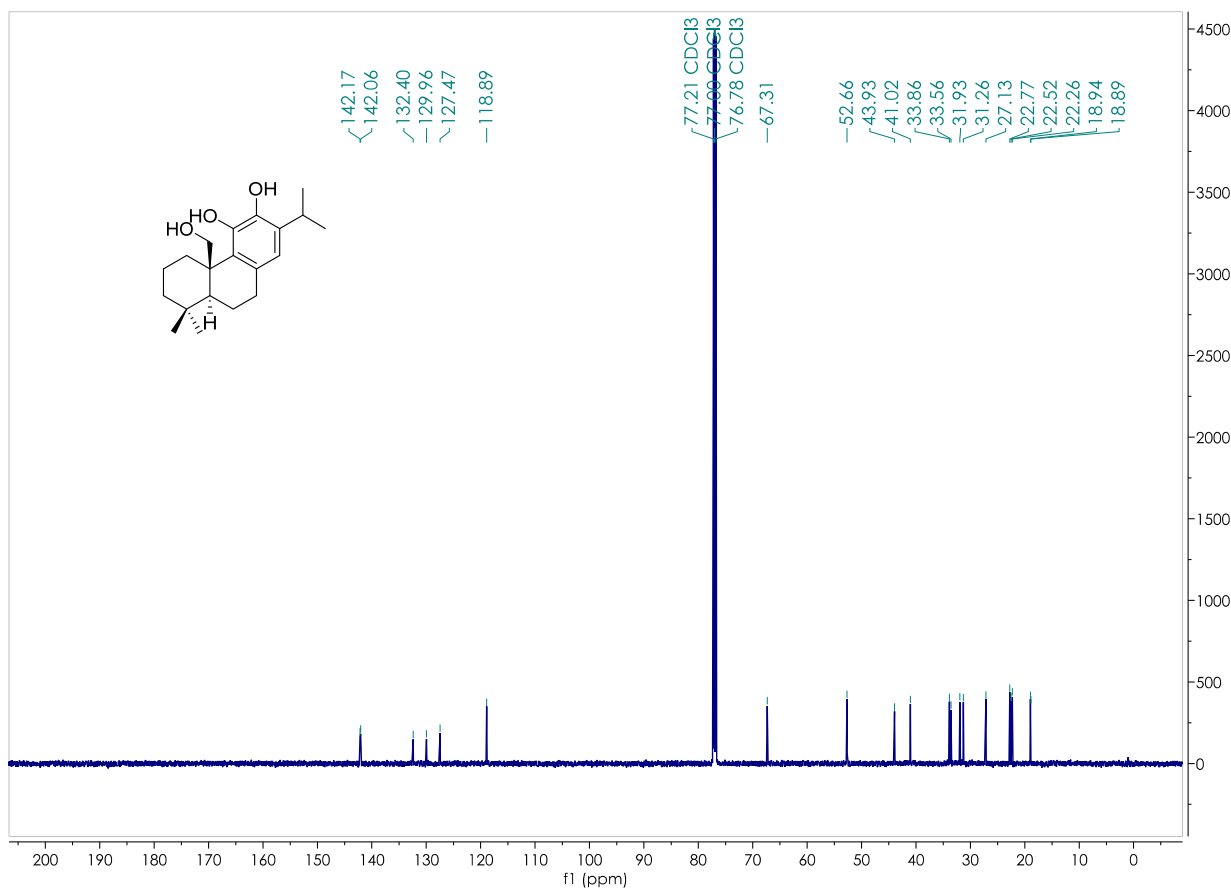Figure S4. <sup>13</sup>C-NMR spectrum of compound 5

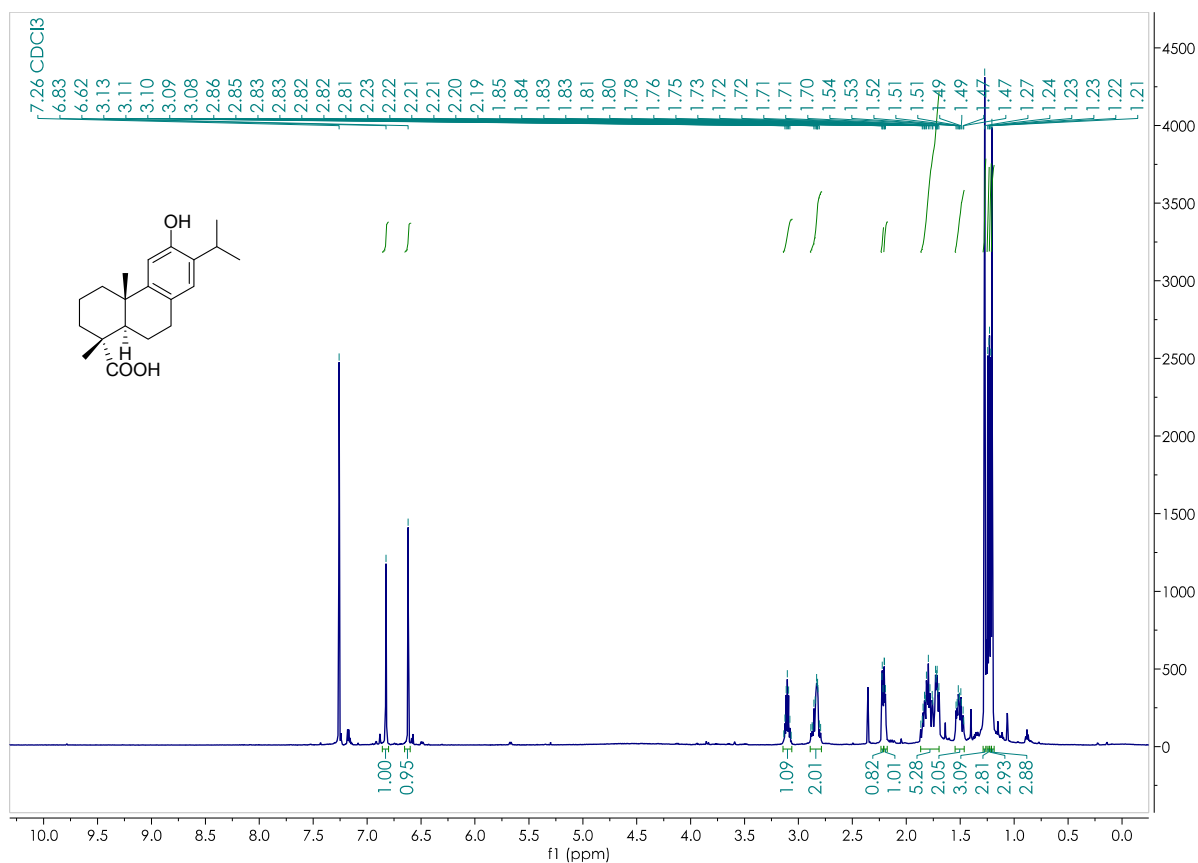Figure S5. <sup>1</sup>H-NMR spectrum of compound 9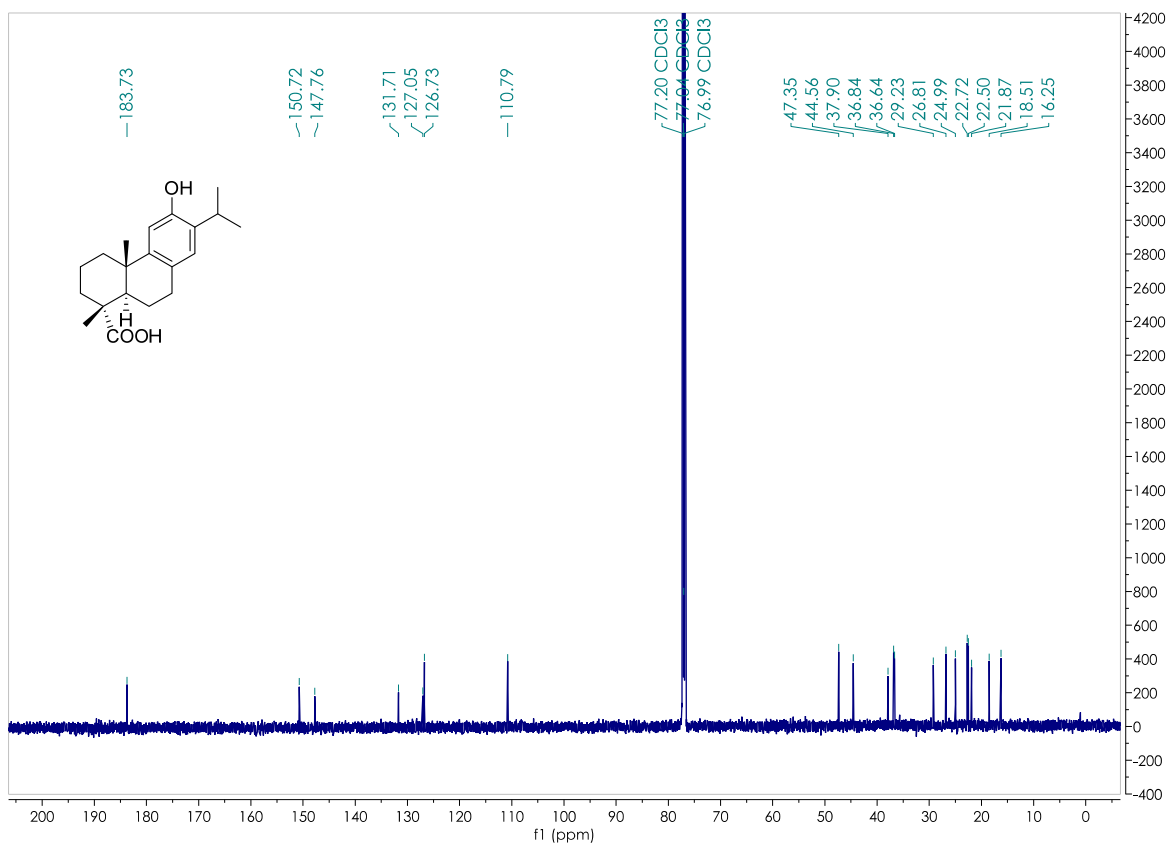Figure S6. <sup>13</sup>C-NMR spectrum of compound 9

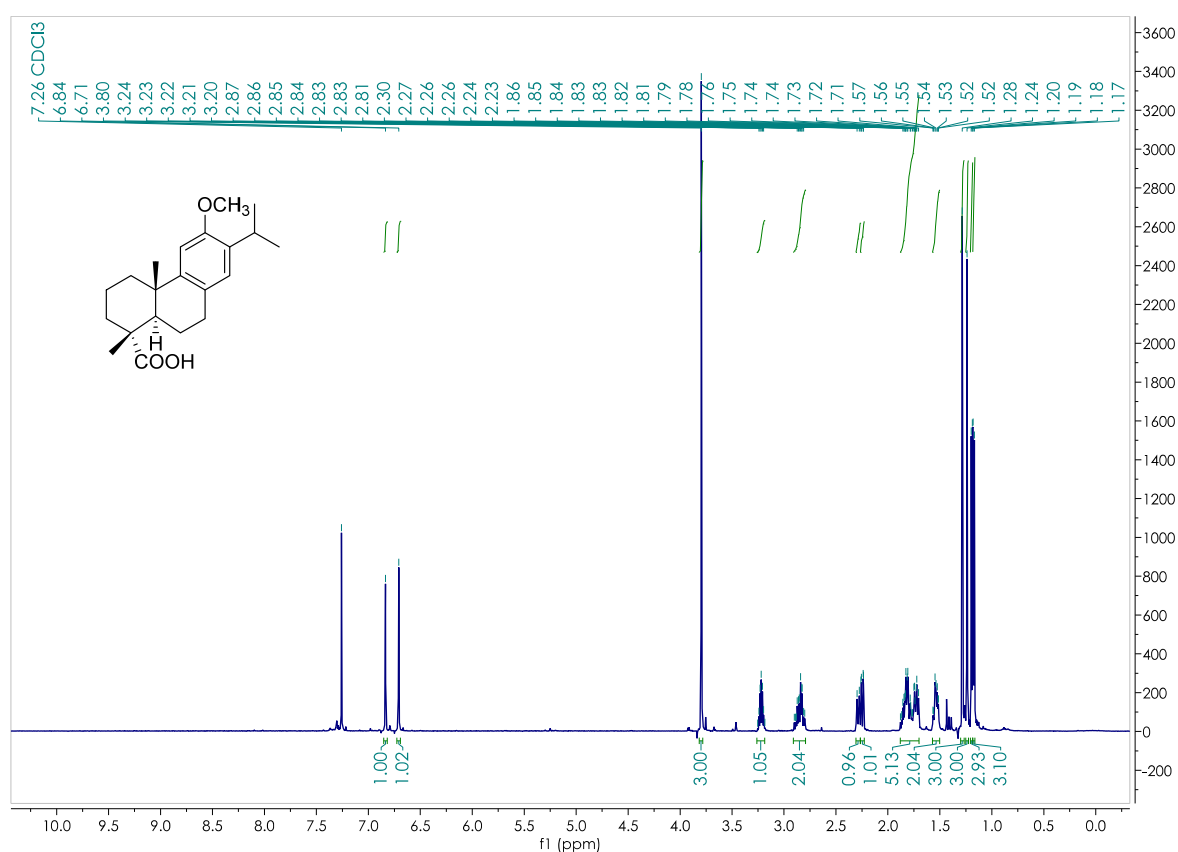Figure S7. <sup>1</sup>H-NMR spectrum of compound 10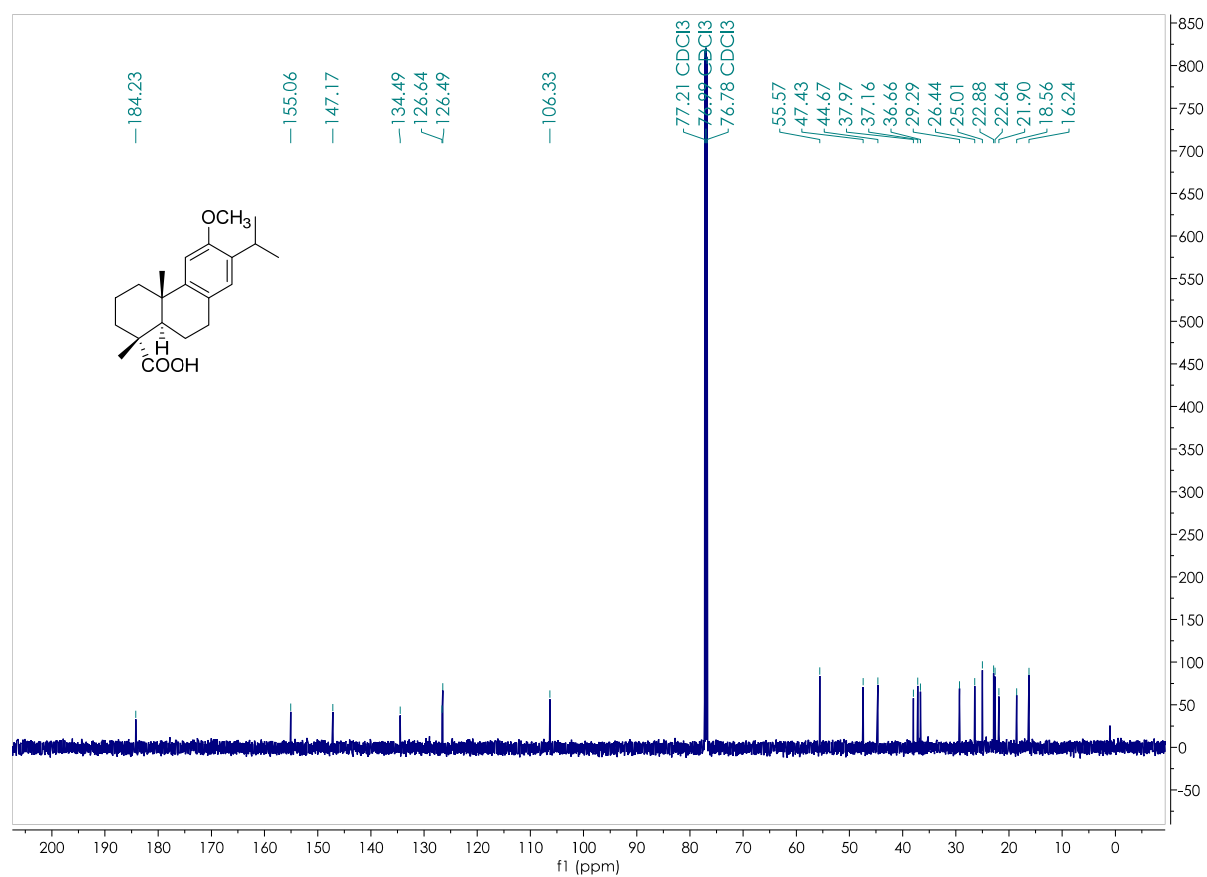Figure S8. <sup>13</sup>C-NMR spectrum of compound 10

## MS spectra data

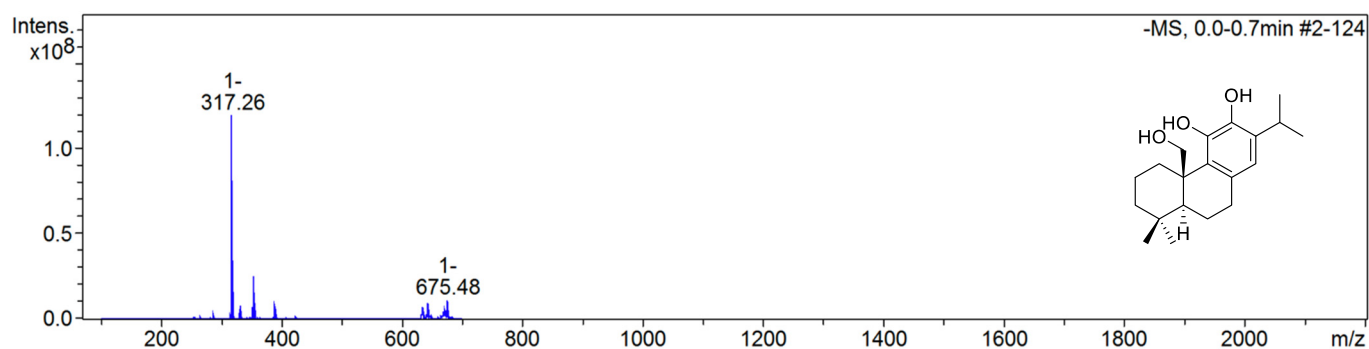

Figure S9. ESI-ITMS spectrum of compound 5

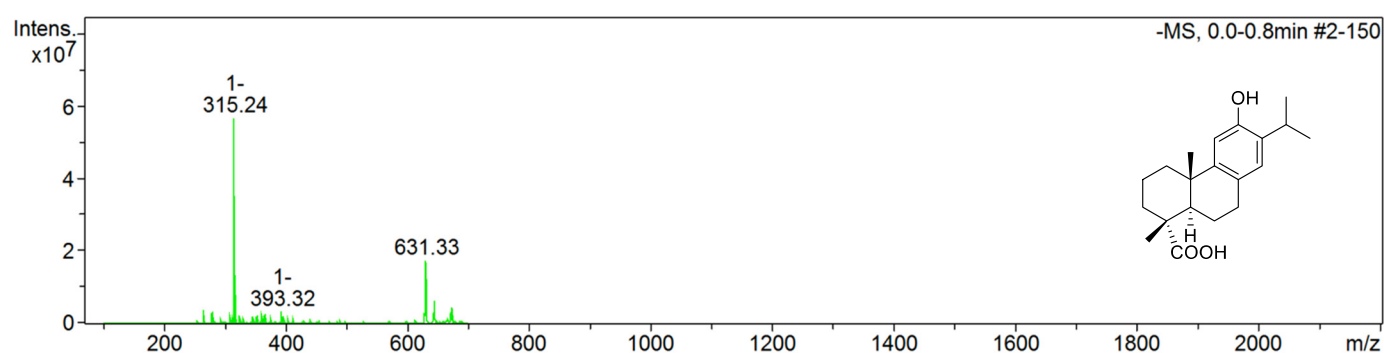

Figure S10. ESI-ITMS spectrum of compound 9

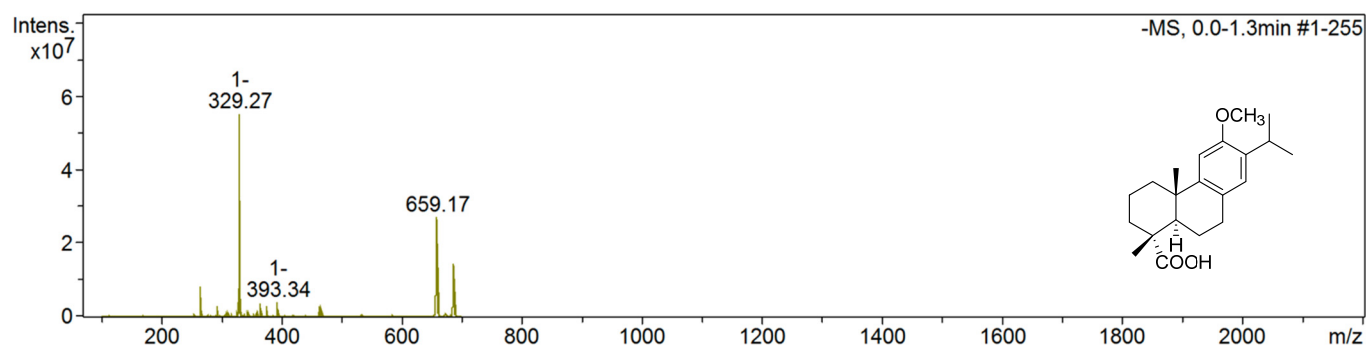

Figure S11. ESI-ITMS spectrum of compound 10
